# Supplementary material
Source: PubMed Central journal article supplement (PMC8750365)
Supplement: NIHMS1763797-supplement-MMC1.pdf [file NIHMS1763797-supplement-MMC1.pdf]

**Molecular Cell, Volume 82**

**Supplemental information**

**MYC assembles and stimulates**

**topoisomerases 1 and 2 in a “topoisome”**

**Subhendu K. Das, Vladislav Kuzin, Donald P. Cameron, Suzanne Sanford, Rajiv Kumar Jha, Zuqin Nie, Marta Trullols Rosello, Ronald Holewinski, Thorkell Andresson, Jan Wisniewski, Toyooki Natsume, David H. Price, Brian A. Lewis, Fedor Kouzine, David Levens, and Laura Baranello**

## **Supplemental information**

### **MYC assembles and stimulates topoisomerases 1 & 2 in a “toposome”**

Subhendu K. Das, Vladislav Kuzin, Donald P. Cameron, Suzanne Sanford, Rajiv Kumar Jha, Zuqin Nie, Marta Trullols Rosello, Ronald Holewinski, Thorkell Andresson, Jan Wisniewski, Toyooki Natsume, David H. Price, Brian A. Lewis, Fedor Kouzine, David Levens and Laura Baranello

**Figure S1**

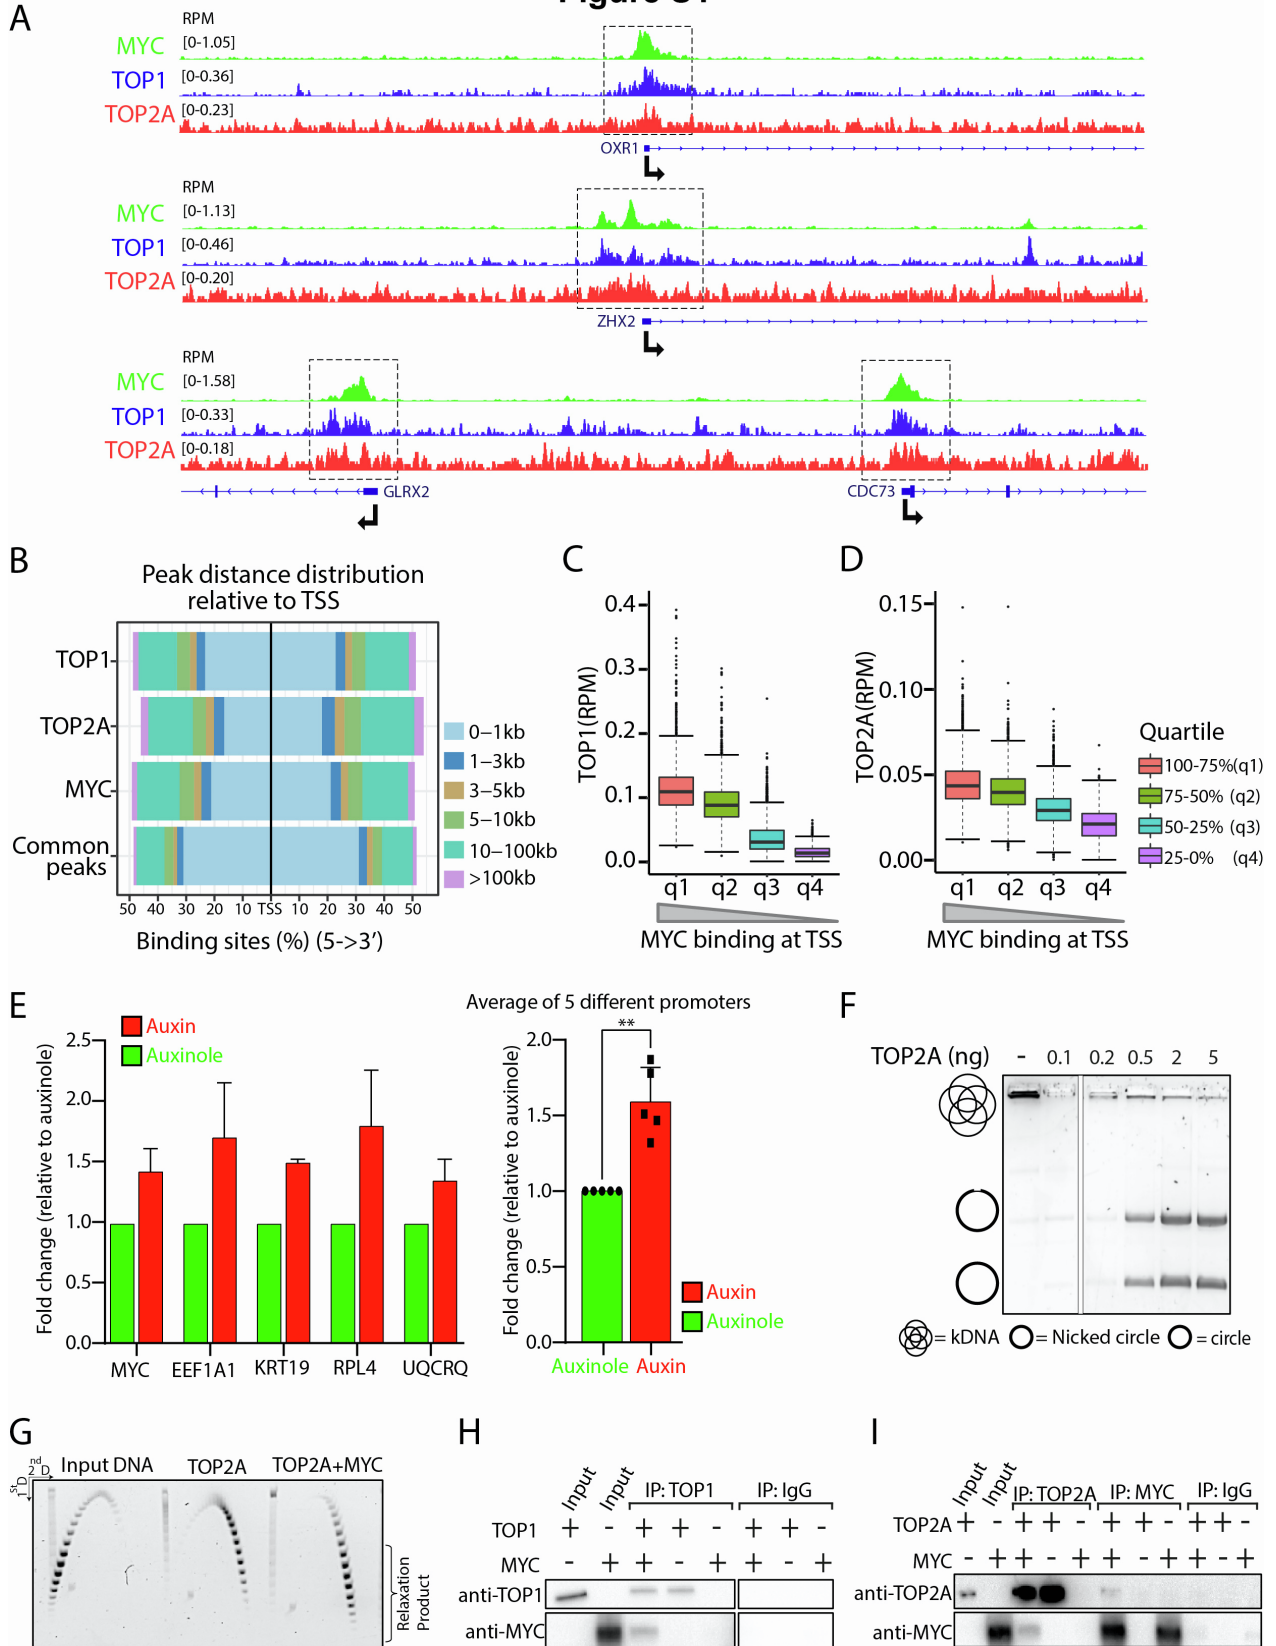

**Figure S1. The recruitment of MYC parallels TOP1 and TOP2A at highly expressed genes. Related to Figure 1.** (A and B) Representative Genome Browser tracks of ChIP-seq showing co-localization (in dashed boxes) of MYC, TOP1 and TOP2A at promoters. (B) Bar graphs of peak distance distribution relative to TSSs of all MYC, TOP1, TOP2A peaks and the subset of peaks they have in common. (C and D) Box plots showing the recruitment of TOP1 (C) or TOP2A (D), with respect to MYC binding at the TSS  $\pm$  500 bps. TSSs are ranked by quartile with highest (100-75%), high (75-50%), medium (50-25%) or low (25-0%) MYC binding. Whiskers indicate lowest and highest values no further than 1.5 x interquartile. (E) Left. K562MYC\_mAID cells were treated with auxin for 30 min followed by MG132 (10  $\mu$ M) for 30 min and Eto (100  $\mu$ M) in the last 5 min. TOP2A CAD-qPCR at TSSs of selected highly expressed genes, normalised on a non transcribed region ( $\alpha$ -sat) and shown as fold change over auxinole treated-sample. Results presented from 3 independent replicas (n = 3; error bars represent the mean  $\pm$  S.E.M.). Right. Average of the different promoters. Statistical significance was calculated by paired t-test (\*\*: p < 0.01). (F) Decatenation assay in presence of increasing amount of recombinant TOP2A. (G) Distribution of product DNA topoisomers after incubation with TOP2A with or without MYC (relaxation products, which run in the right/bottom corner, are indicated). Representative blot from 2 replicas. (H) Recombinant TOP1 and full length MYC were mixed and immunoprecipitated with anti-TOP1 and probed for MYC (N-term) or TOP1. (I) Recombinant TOP2A and full length MYC were mixed and immunoprecipitated with anti-TOP2A or anti-MYC and probed for TOP2A or MYC. Representative blots for 3 independent replicas are shown.

**Figure S2**

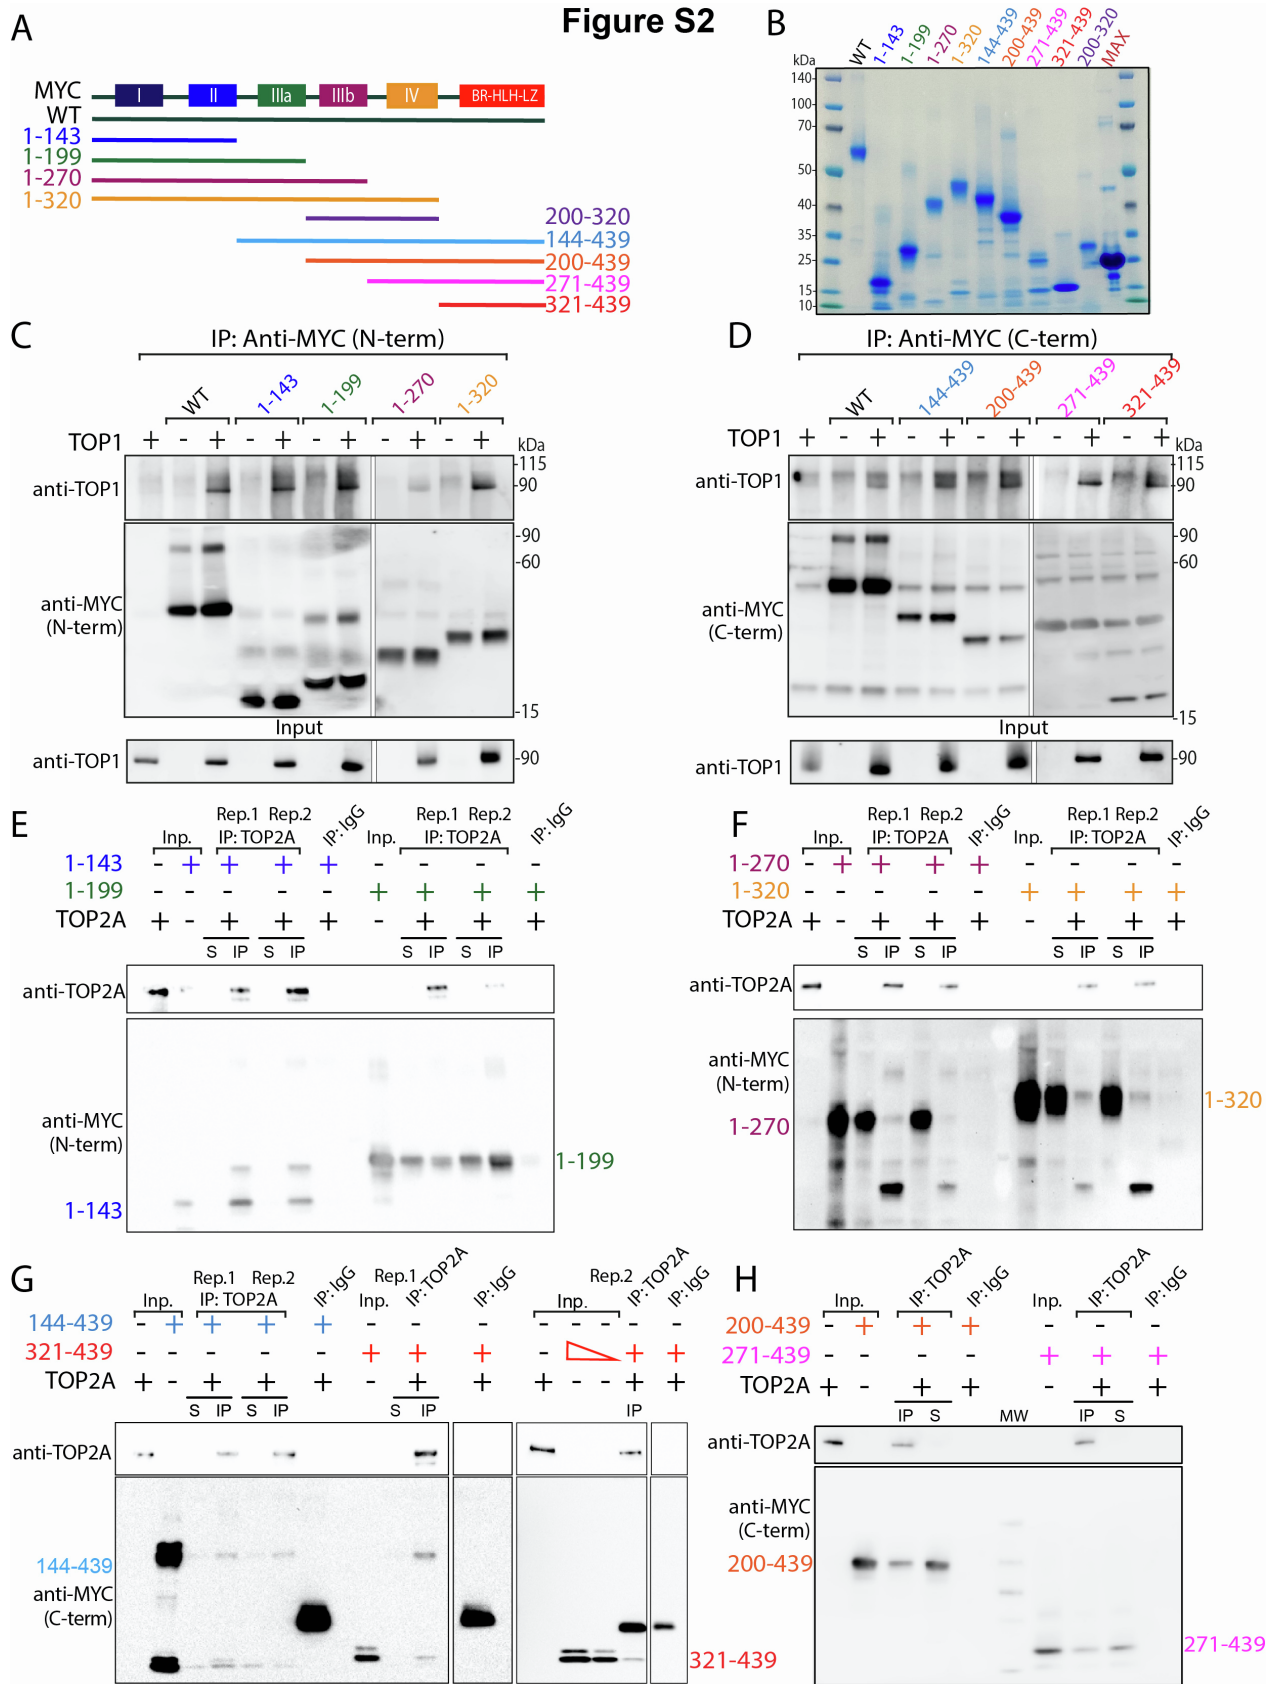

**Figure S2. The N and C termini of MYC interact with TOP1 and TOP2A. Related to Figure 2.** (A) Diagram of full length MYC (WT) depicting MYC-boxes (I - IV), basic region-helix-loop-helix-leucine zipper domain (bHLH-LZ) and different truncation mutants extending from either the carboxyl-terminus “(1–143, 1–199, 1–270, 1–320)” or the amino-terminus “(144–439, 200–439, 271–439, 321–439)” and from both ends “(200–320)”. (B) SDS–PAGE stained with Coomassie brilliant blue of the recombinant MYC WT, MYC truncation mutants shown in (A), and MAX used in this study. (C and D) Recombinant full length MYC (WT), or truncated from the N-terminus (C) or C-terminus (D) alone or together with recombinant TOP1 were immunoprecipitated with anti-MYC (N-term) or anti-MYC (C-term) as indicated, and probed for TOP1 and MYC (anti-N-term or anti-C-term). Representative blots from 3 independent replicas are shown. (E–H) Recombinant TOP2A was combined with the indicated truncated MYC, immunoprecipitated with anti-TOP2A and probed for MYC (anti-N-term or anti-C-term) and anti-TOP2A as described. Two immunoprecipitation experiments (Rep. 1 & Rep. 2) were performed for each IP, where both the unbound supernatant (S) and pulled down proteins (IP) were loaded. Expected sizes for each MYC truncation are indicated on the blots. IgG was used in the immunoprecipitation as a negative control.

**Figure S3**

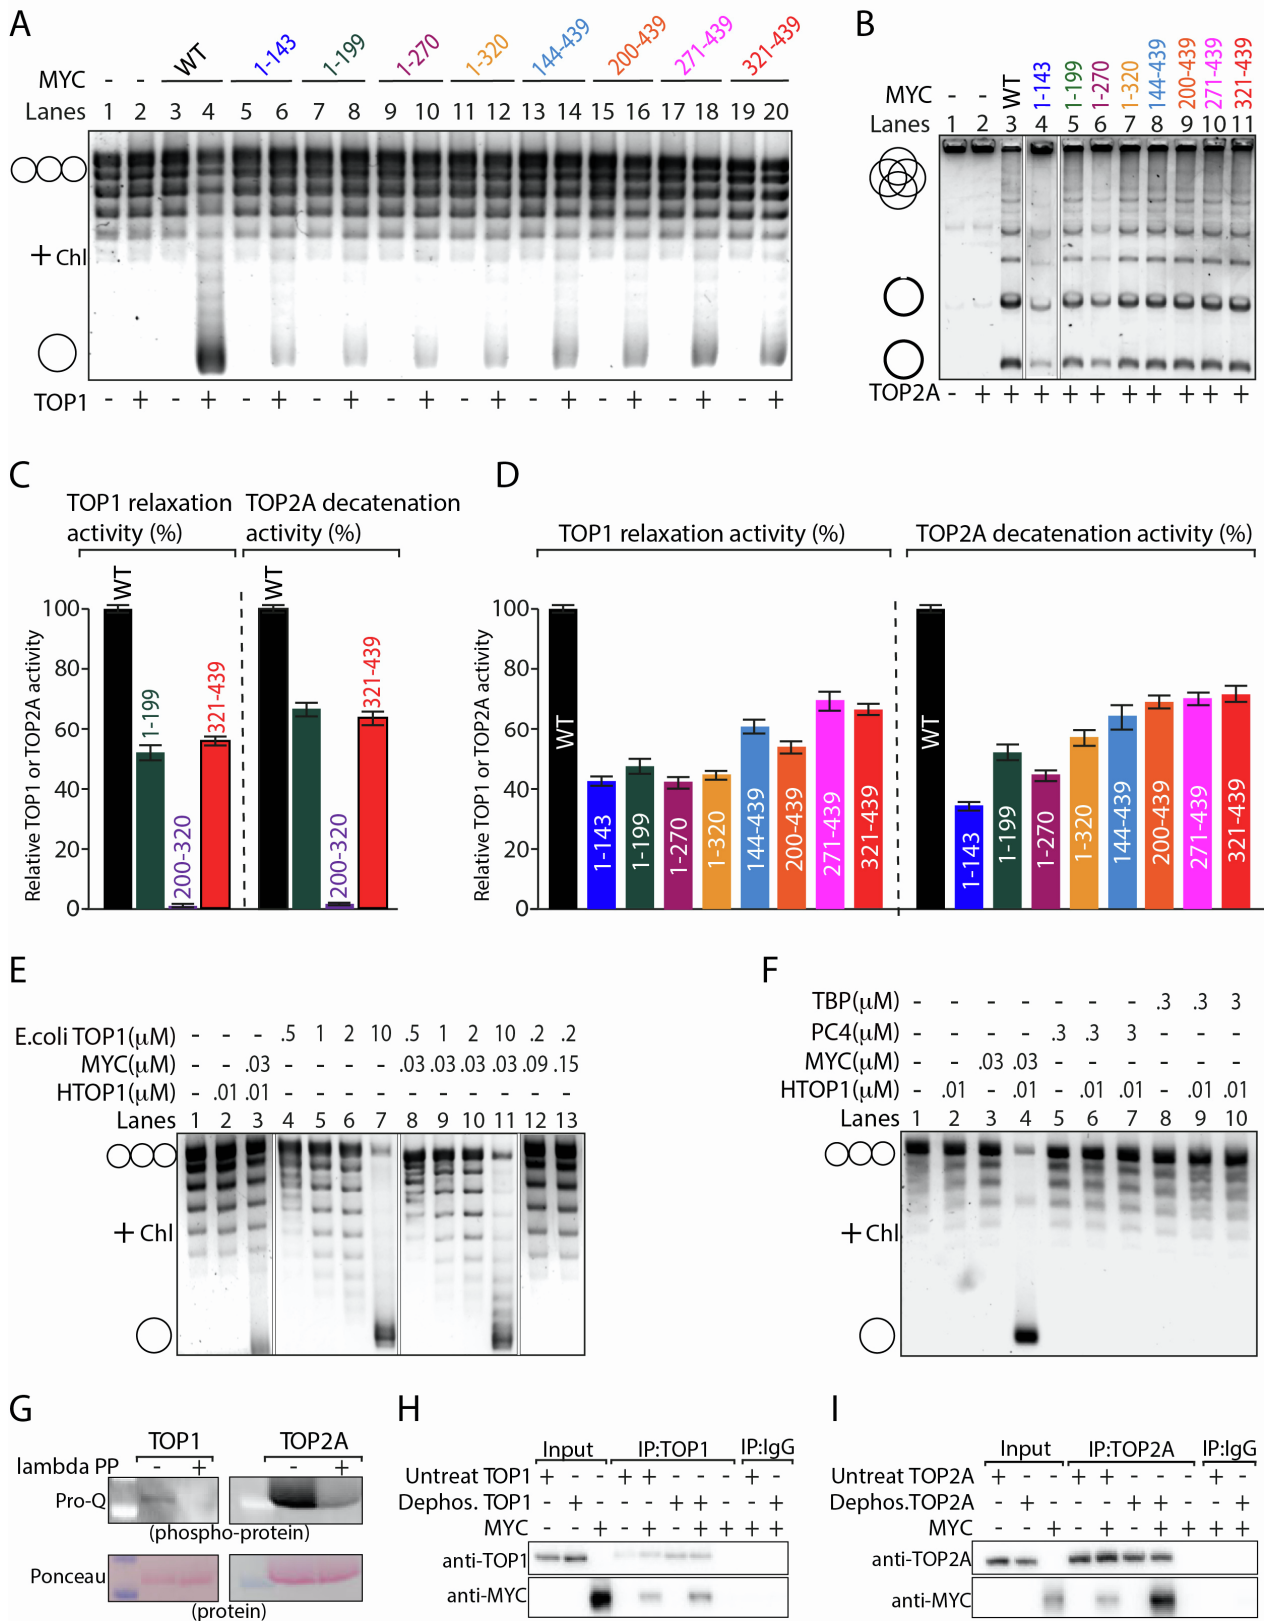

**Figure S3. The N and C termini of MYC both stimulate topoisomerases. Related to Figure 2.**

(A and B) Recombinant full length MYC (WT) or the indicated truncations shown in Figure S2A were pre-incubated with or without TOP1 (A) or TOP2A (B) before addition of plasmid DNA or kDNA, respectively. TOP1 reaction products were checked by agarose gel electrophoresis in presence of chloroquine (Chl), and TOP2A products were run in presence of ethidium bromide. (C) Percentage of DNA relaxation by TOP1 (showed in **Figure 2D**) and decatenation by TOP2A (showed in **Figure 2E**) in presence of the indicated MYC variants. Each experiment was performed more than 3 times. (n=4; error bars represent the mean  $\pm$  S.E.M.). (D) Percentage of plasmid DNA relaxation by TOP1 (showed in **Figure S3A**) and decatenation by TOP2A (showed in **Figure S3B**) in presence of the indicated MYC variants. Experiments were performed more than 3 times (n=4; error bars represent the mean  $\pm$  S.E.M.). (E) Indicated concentrations of *E. coli* TOP1A or human TOP1 (HTOP1) were preincubated alone or with the indicated concentrations of purified MYC before addition of plasmid DNA. The products from relaxation assay were subjected to agarose gel electrophoresis in presence of Chl. Relaxed products migrate at the bottom of the gel. (F) Recombinant human TATA-binding protein (TBP) or positive cofactor 4 (PC4) or full length MYC were mixed with human TOP1 (HTOP1) as indicated, before addition of plasmid DNA. Reaction products were run on agarose gel electrophoresis with Chl. All experiments were performed at least 3 times. (G) Recombinant TOP1 and TOP2A were dephosphorylated by lambda protein phosphatase (lambda PP). Dephosphorylation was confirmed by western blotting and by probing the membrane for phosphoproteins (using the Pro-Q, upper panel) and counterstaining for total protein using Ponceau stain (lower panel). (H and I) Phosphorylated and dephosphorylated TOP1 and TOP2A were incubated with full length MYC, immunoprecipitated with anti-TOP1 (H) and anti-TOP2A (I) and blotted for detection of MYC, TOP1 (H) and TOP2A (I). Experiments were performed in triplicates and representative blots are shown.



**Figure S4**

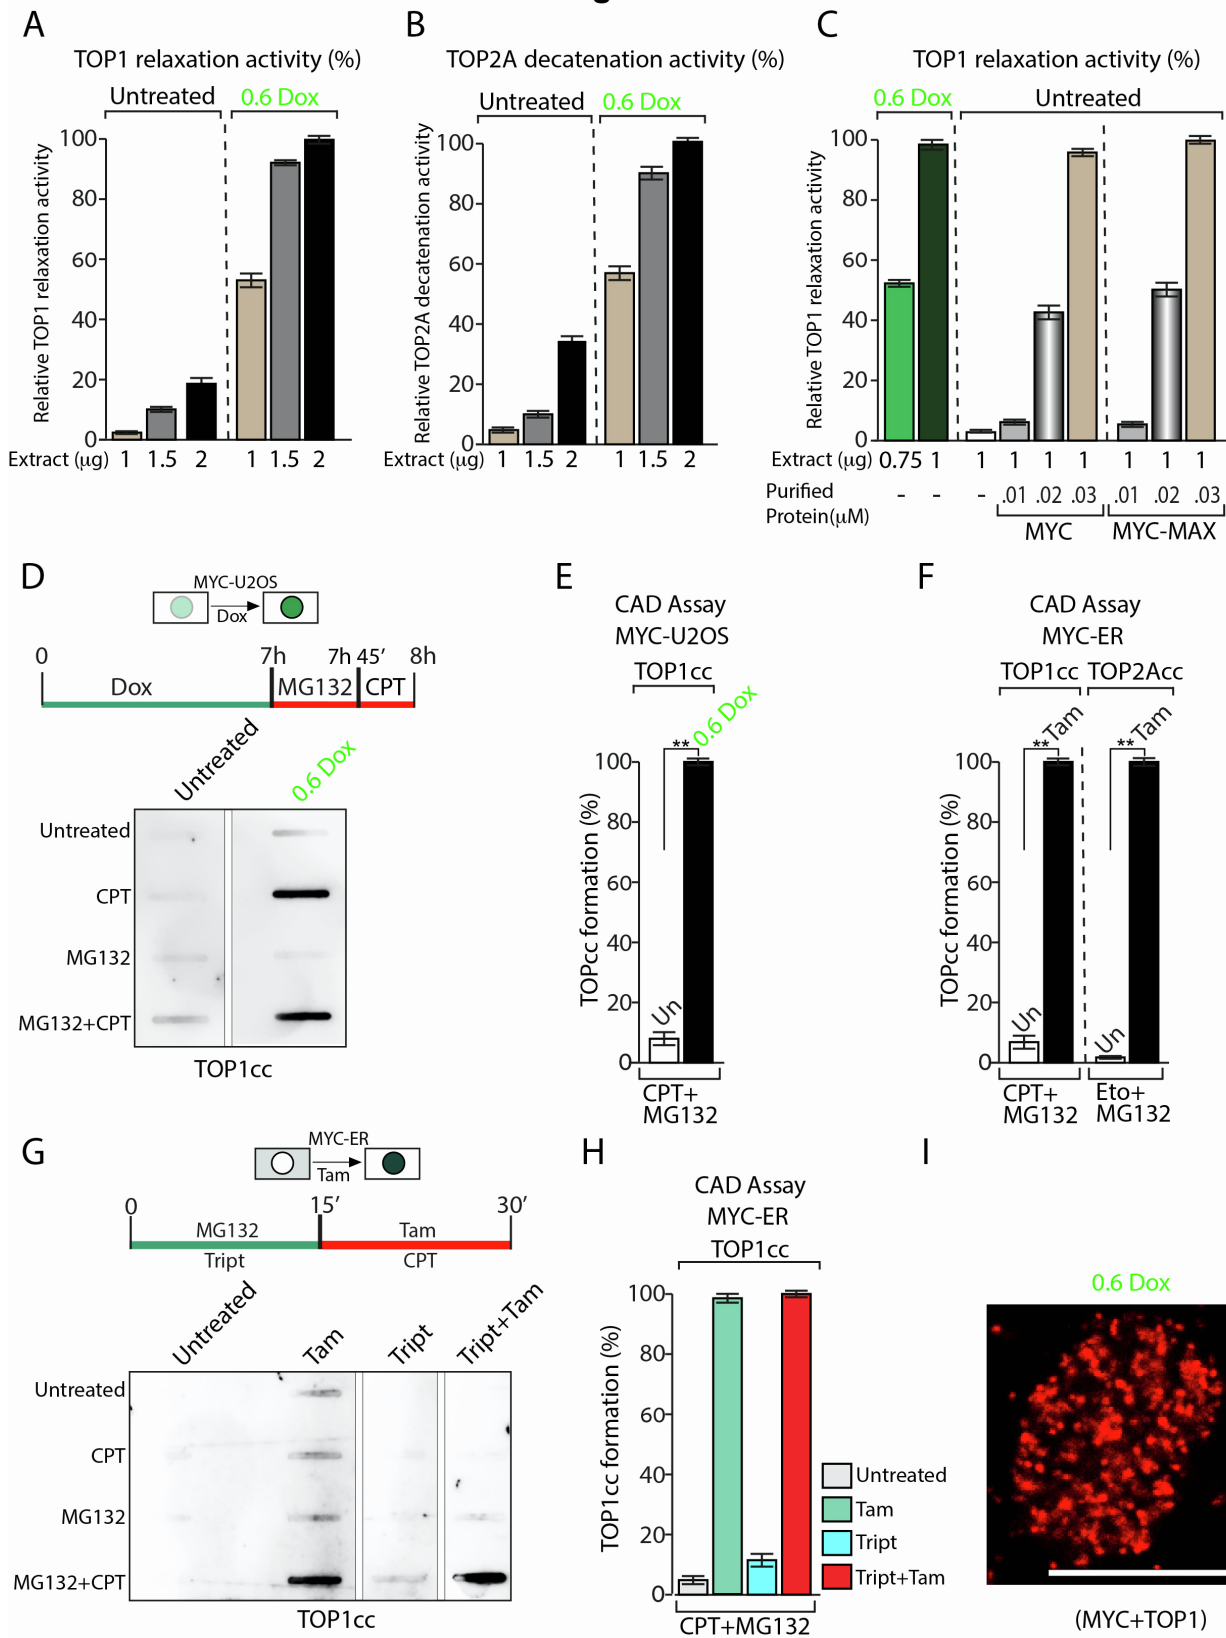

**Figure S4. MYC sponsors the covalent engagement of topoisomerase-DNA complexes in cells.**

**Related to Figure 3.** (A and B) Percentage of plasmid DNA relaxation by TOP1 (A) and percentage of decatenation by TOP2A (B) using the indicated amount of lysate from untreated or Dox-induced (0.6  $\mu\text{g/ml}$ ) U2OS-MYC-EGFP cells showed in **Figure 3B** and C, respectively. Each experiment was performed at least 3 times ( $n=5$ ; error bars represent the mean  $\pm$  S.E.M.). (C) Percentage of plasmid DNA relaxation by TOP1 from experiment shown in **Figure 3D**. The amount of extract from untreated or Dox-induced (0.6  $\mu\text{g/ml}$ ) U2OS-MYC-EGFP cells is indicated as well as the amount of purified MYC or MYC-MAX ( $n=3$ ; error bars represent the mean  $\pm$  S.E.M.). (D) Trapped TOP1cc detected by CAD assay. Untreated and Dox-induced (0.6  $\mu\text{g/ml}$ ) U2OS-MYC-EGFP cells were treated with CPT (10 $\mu\text{M}$ ) in the presence/absence of MG132 (10 $\mu\text{M}$ ) respectively for the indicated time (top) and were immunoblotted with anti-TOP1 antibody. Samples of the CAD assay are loaded every other lane for clarity. (E) Quantification of trapped TOP1 cleavage complexes (TOP1cc) detected in U2OS-MYC-EGFP cells treated with CPT (10 $\mu\text{M}$ ) and MG132 (10 $\mu\text{M}$ ) as showed in **Figure S4D**. Significance was assessed by two-way ANOVA using Dunnett's correction for multiple comparisons ( $n = 3$ ; mean  $\pm$  S.E.M.,  $**P < 0.001$ ; t test). (F) Quantification of trapped TOP1ccs or TOP2Accs detected in HO15.19-MYC-ER cells treated with Eto (25 $\mu\text{M}$ ) and MG132 as indicated in **Figures 3E** and **3F**. Significance was assessed by two-way ANOVA using Dunnett's correction for multiple comparisons ( $n = 4$ ; mean  $\pm$  S.E.M.,  $**P < 0.001$ ; t test). (G) Immunoblot showing TOP1ccs detected by CAD assay in HO15.19-MYC-ER cells treated as indicated and probed with anti-TOP1. Experiments were performed in biological triplicates and representative blots are shown. (H) Quantification of trapped TOP1ccs detected in **Figure S4G** ( $n=3$ ; error bars represent mean  $\pm$  S.E.M.). Based on statistical test (two-way ANOVA using Dunnett's correction for multiple comparisons) the difference between Tam and Trip+Tam is not significant. (I) Representative image showing an enlarged picture of PLA using anti-MYC and anti-TOP1 in U2OS-MYC-EGFP cells induced with 0.6  $\mu\text{g/ml}$  of Dox (relative to **Figure 3G**, left) (scale bars, 15  $\mu\text{m}$ ).

**Figure S5**

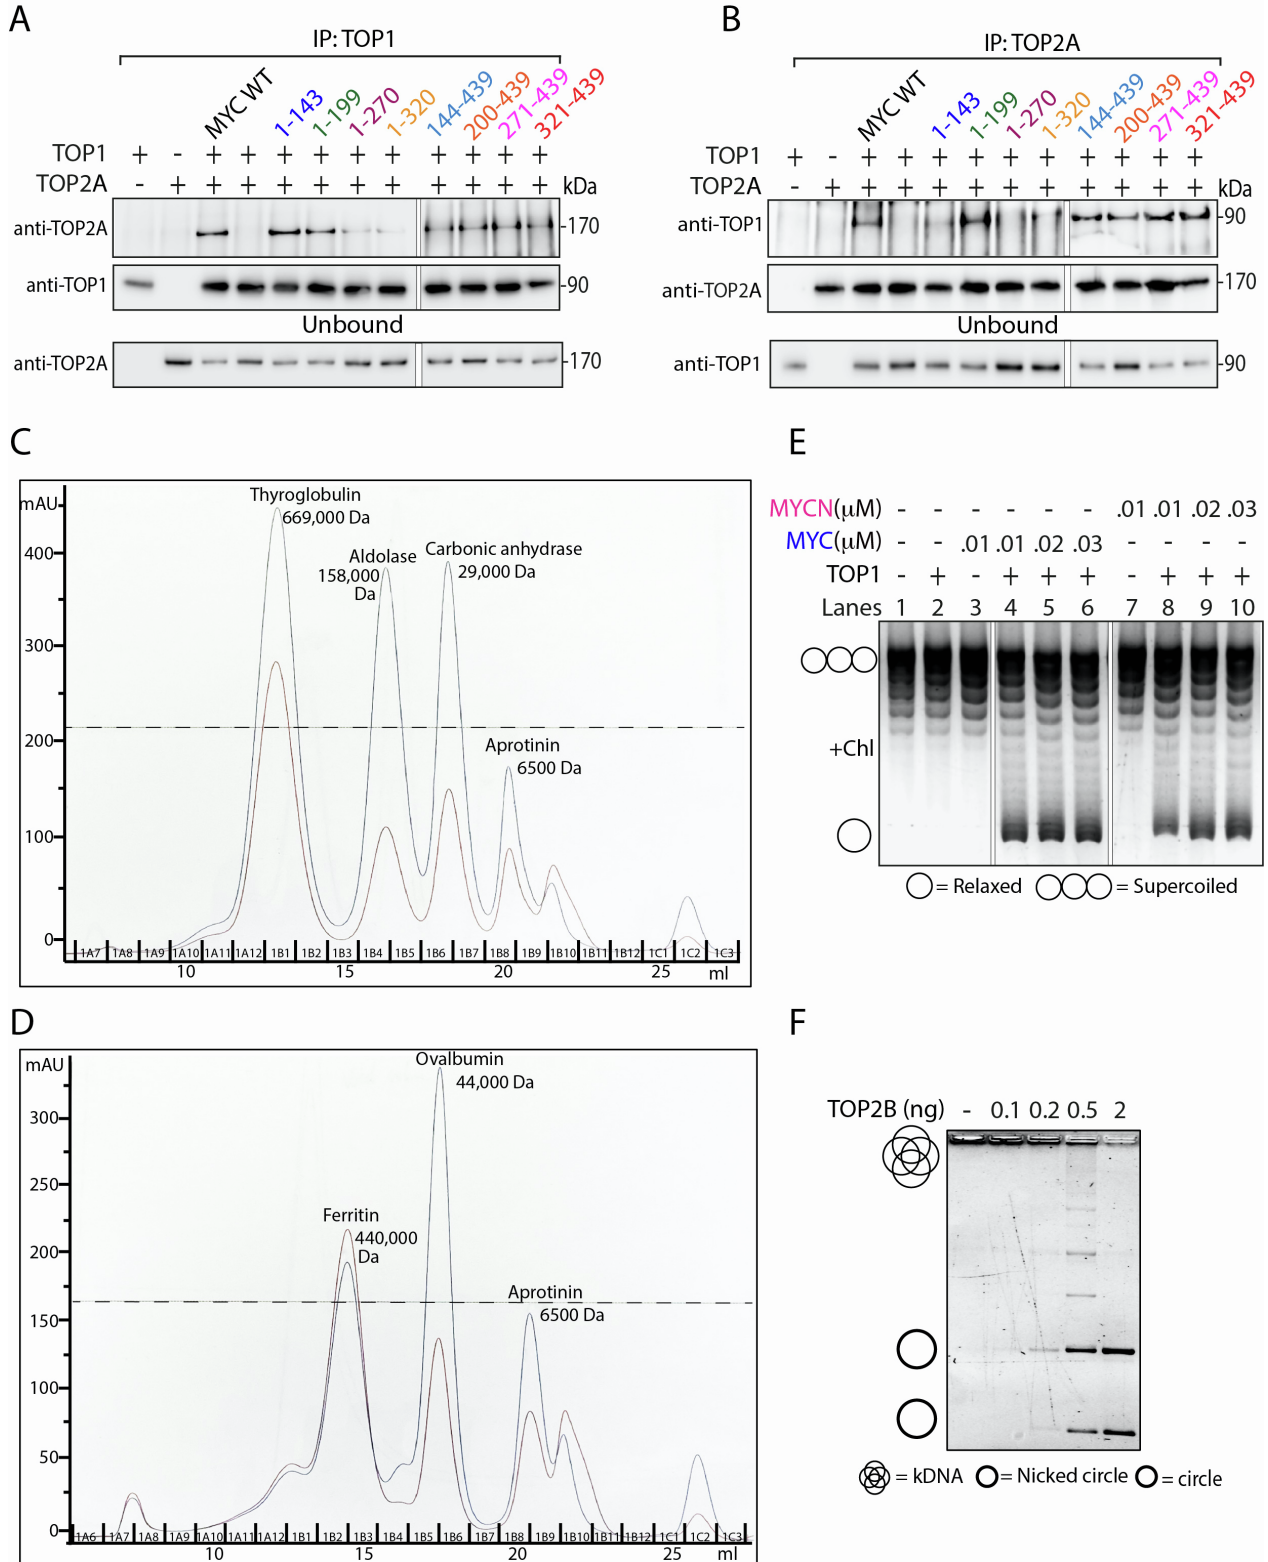

**Figure S5. Truncated N- or C-terminal regions of MYC joins TOP1 and TOP2A to form a unique complex. Related to Figure 4 and Figure 5. (A and B)** Recombinant TOP1 or TOP2A were mixed with the indicated MYC full length or MYC truncations, immunoprecipitated with anti-TOP1 **(A)** or anti-TOP2A **(B)** and probed for TOP1 and TOP2A. Shown are representative blots from 3 independent replicas. **(C and D)** Elution profile of the marker proteins (high molecular weight marker kit, cytiva) with the indicated molecular mass. **(E)** Recombinant full length MYC or MYCN were pre-incubated with TOP1, as indicated, before addition of plasmid DNA and reaction products were checked by agarose gel electrophoresis with Chl. Experiment were performed more than 3 times. **(F)** Decatenation assay in presence of increasing amount of recombinant TOP2B. Representative gel of 2 independent replicas.

**Figure S6**

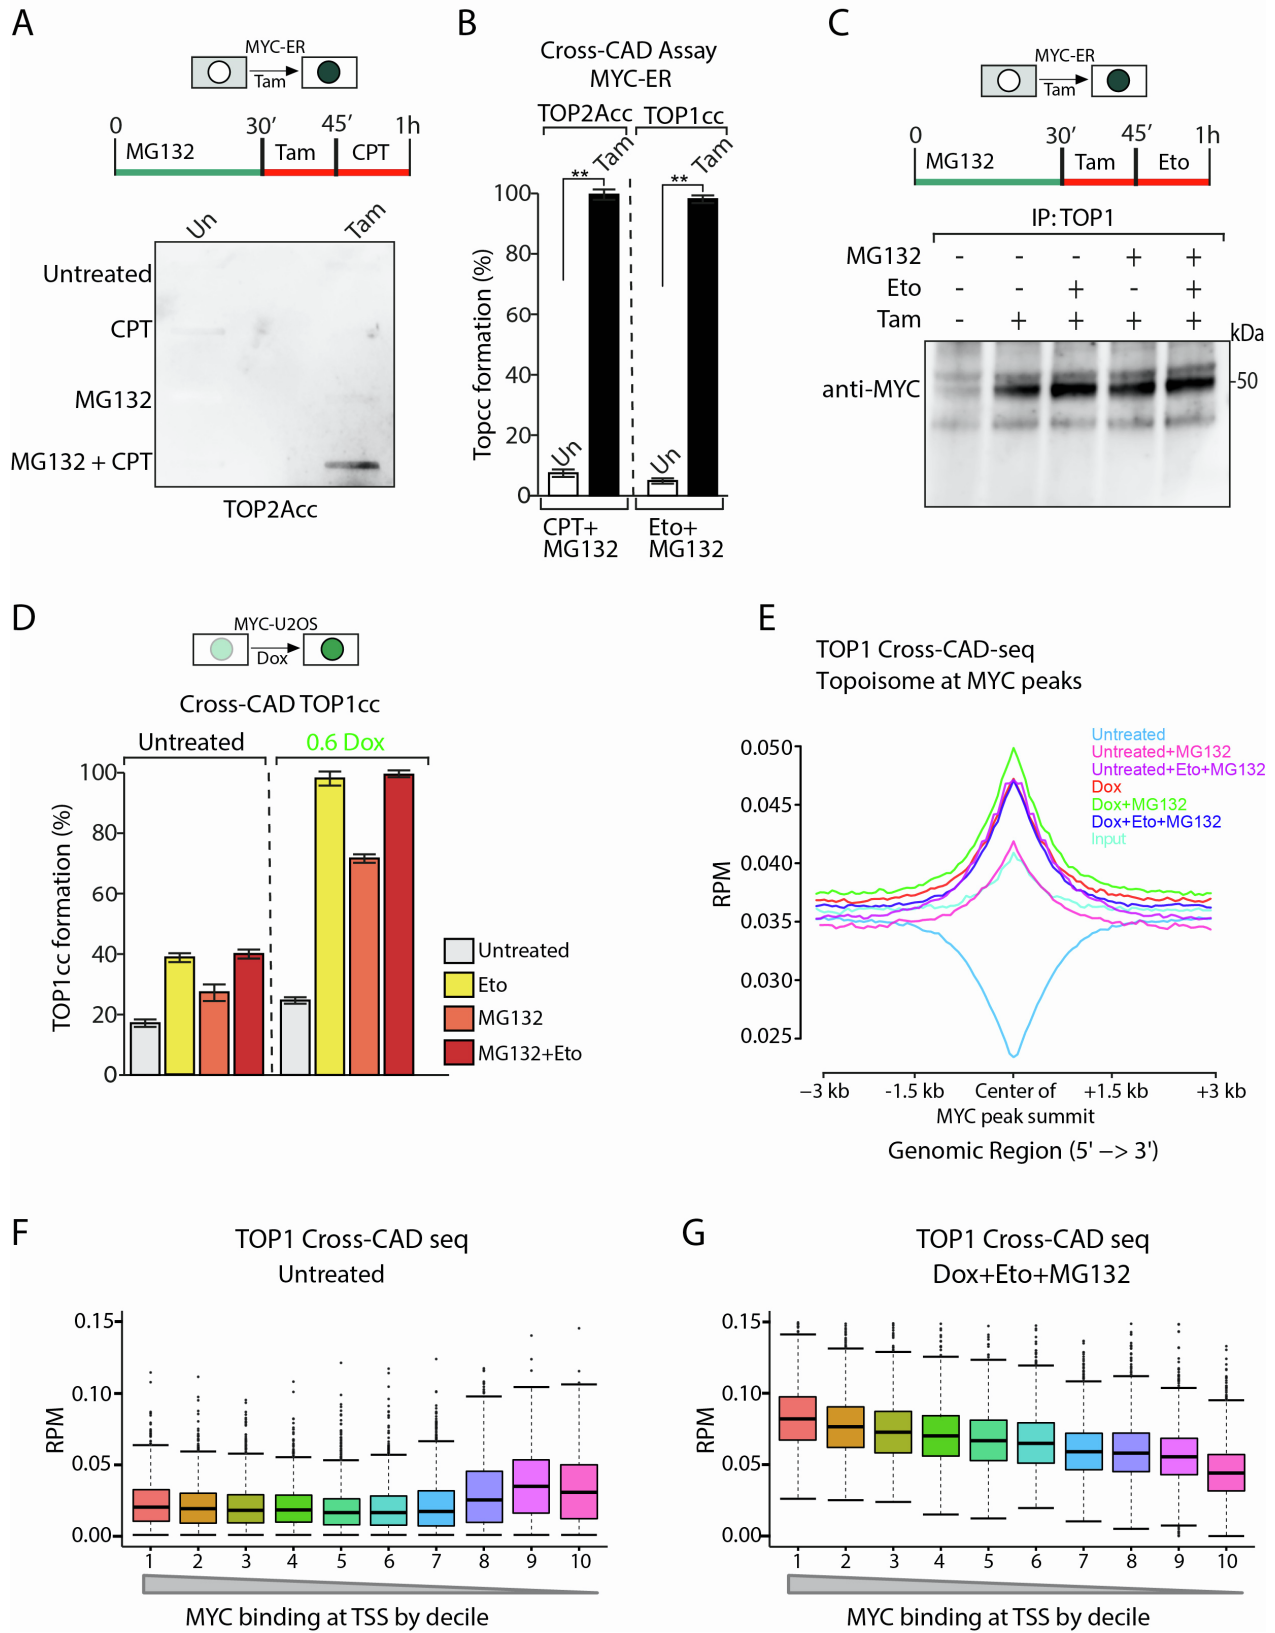

**Figure S6. MYC adjusts the dynamics of topoisome engagement at genes to favor transcription. Related to Figure 6.** (A) Detection of MYC-tethered TOP2Acc along with CPT (10 $\mu$ M)-trapped TOP1cc by cross-CAD assays in HO15.19-MYC-ER cells treated as indicated (top) and detected by immunoblotting with anti-TOP2A. Samples of the cross-CAD assay are loaded every other lane for clarity. (B) Quantification of MYC-tethered TOP2Acc along with CPT (10 $\mu$ M)-trapped TOP1cc or MYC-tethered TOP1cc along with Eto (25 $\mu$ M)-trapped TOP2Acc by cross-CAD assays in HO15.19-MYC-ER cells (representative blot is shown in **Figures 6B** and **S6A**). Each experiment was performed more than 3 times. Significance was assessed by two-way ANOVA using Dunnett's correction for multiple comparisons ( $n = 4$ ; mean  $\pm$  S.E.M.,  $^{**}P < 0.001$ ; t test). (C) Nuclear extracts from HO15.19-MYC-ER cells treated with or without 200 nM Tam, Eto (25 $\mu$ M) or MG132 (50 $\mu$ M), were immunoprecipitated with anti-TOP1 and probed for MYC. (D) Quantification of MYC-tethered TOP1cc along with Eto (25 $\mu$ M)-trapped TOP2Acc by cross-CAD assays in U2OS-MYC-EGFP cells in the presence or absence of 0.6  $\mu$ g/ml Dox (representative blot is shown in **Figure 6C**). Each experiment was performed at least 3 times ( $n=3$ ; error bars represent mean  $\pm$  S.E.M.). (E) TOP1 cross-CAD-seq signal at MYC binding sites, centered around peak summits. MYC ChIP seq from (Lorenzin et al. 2016) was used to define MYC peak summit. (F-G) Box plots of TOP1 cross-CAD-seq (RPM) at TSSs of 70% most expressed genes (based on RNA-seq (Ibarra et al. 2016)). TSS  $\pm$  500 bps are sorted into deciles according to decreasing MYC binding (using the dataset +Dox from (Lorenzin et al. 2016)) from 1 to 10, and the cross-CAD-seq reads from untreated (F) and sample treated with Dox+MG132+Eto (G) are computed in each decile. Whiskers indicate lowest and highest values no further than 1.5 x interquartile.

**Figure S7**

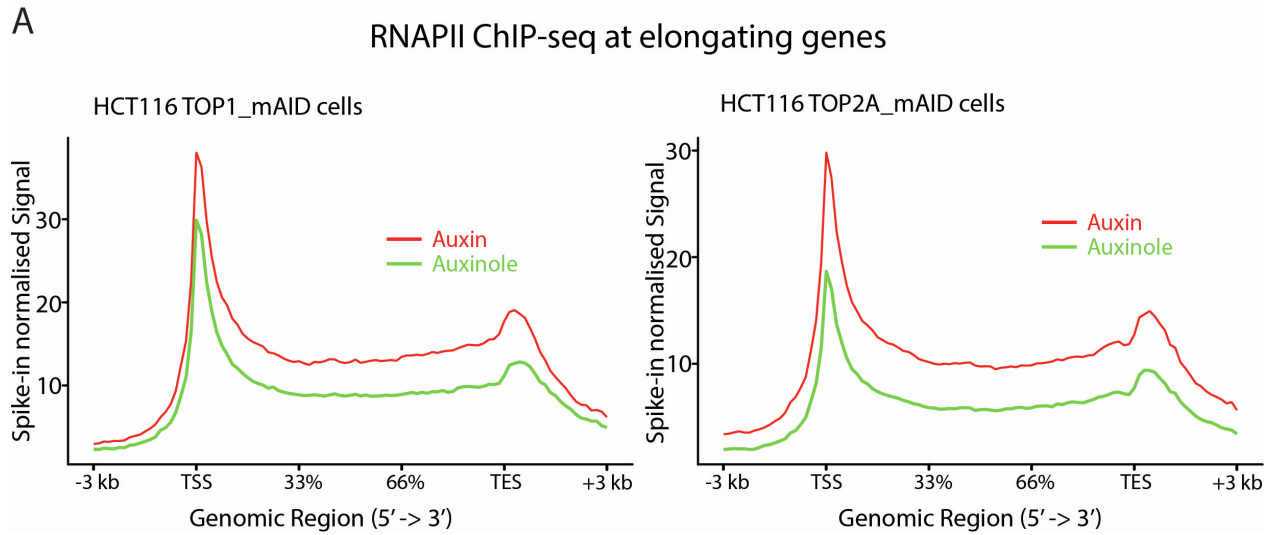

**Figure S7. Degradation of TOP1 or TOP2A triggered marked accumulation of RNAPII. Related to Figure 7. (A)** RNAPII signal (spike-in normalized) from HCT116TOP1\_mAID cells (left) or HCT116TOP2A\_mAID cells (right) treated with auxin or auxinole was plotted at elongating genes identified by pausing index (calculated in the auxinole sample). Pausing index is the ratio between RNAPII bound at the TSS and RNAPII bound in the gene body (see **STAR Methods**).

## Supplementary Tables

**Table S1.**

| ChIP-seq | Peak caller | Total number of peaks | Number of peaks after filtering for blacklisted hg38 regions |
|----------|-------------|-----------------------|--------------------------------------------------------------|
| TOP1     | MACS3       | 20694                 | 19834                                                        |
| TOP2A    | EPIC2       | 14623                 | 13383                                                        |
| MYC      | MACS3       | 36983                 | 34917                                                        |

**Table S1. Number of TOP1, TOP2A and MYC ChIP-seq peaks. Related to Figure 1.**

For detailed peak files please access the GEO database, accession number GSE181447.

File name: GSE181447\_Supplementary\_table\_ChIP-seq\_peaks.xlsx



**Table S2.**

## ChIP-seq

| Sample name                           | Total sequenced reads | Unique deduplicated dm6 spike-in reads |
|---------------------------------------|-----------------------|----------------------------------------|
| TOP2A ChIP-seq 1                      | 24,904,071            |                                        |
| TOP2A ChIP-seq 2                      | 29,071,653            |                                        |
| MYC ChIP-seq 1                        | 25,897,232            |                                        |
| MYC ChIP-seq 2                        | 35,267,961            |                                        |
| MYC ChIP-seq TOP1-mAID auxin 1        | 37,690,949            | 34,706                                 |
| MYC ChIP-seq TOP1-mAID auxin 2        | 33,892,390            | 40,396                                 |
| MYC ChIP-seq TOP1-mAID auxinole 1     | 37,143,594            | 14,396                                 |
| MYC ChIP-seq TOP1-mAID auxinole 2     | 53,559,918            | 51,015                                 |
| MYC ChIP-seq TOP2A-mAID auxin 1       | 29,090,462            | 81,244                                 |
| MYC ChIP-seq TOP2A-mAID auxin 2       | 31,105,771            | 69,421                                 |
| MYC ChIP-seq TOP2A-mAID auxinole 1    | 28,727,255            | 94,588                                 |
| MYC ChIP-seq TOP2A-mAID auxinole 2    | 27,832,569            | 75,608                                 |
| RNAPII ChIP-seq TOP1-mAID auxin 1     | 33,375,643            | 22,900                                 |
| RNAPII ChIP-seq TOP1-mAID auxin 2     | 38,017,226            | 33,504                                 |
| RNAPII ChIP-seq TOP1-mAID auxinole 1  | 24,159,772            | 21,853                                 |
| RNAPII ChIP-seq TOP1-mAID auxinole 2  | 37,606,468            | 27,539                                 |
| RNAPII ChIP-seq TOP2A-mAID auxin 1    | 22,495,459            | 24,324                                 |
| RNAPII ChIP-seq TOP2A-mAID auxin 2    | 35,800,690            | 37,847                                 |
| RNAPII ChIP-seq TOP2A-mAID auxinole 1 | 20,276,516            | 38,269                                 |
| RNAPII ChIP-seq TOP2A-mAID auxinole 2 | 22,259,976            | 35,195                                 |

## CAD-seq

| Sample name                        | Total sequenced reads |
|------------------------------------|-----------------------|
| TOP1cc CAD-seq MYC-mAID auxin 1    | 26,415,581            |
| TOP1cc CAD-seq MYC-mAID auxin 2    | 25,498,562            |
| TOP1cc CAD-seq MYC-mAID auxinole 1 | 31,002,490            |
| TOP1cc CAD-seq MYC-mAID auxinole 2 | 26,804,708            |

## Cross-CAD-seq

| Sample name                           | Total sequenced reads |
|---------------------------------------|-----------------------|
| TOP1cc cross-CAD-seq input            | 101,109,808           |
| TOP1cc cross-CAD-seq untr 1           | 96,607,282            |
| TOP1cc cross-CAD-seq untr 2           | 127,543,246           |
| TOP1cc cross-CAD-seq untr MG132 1     | 121,400,934           |
| TOP1cc cross-CAD-seq untr MG132 2     | 111,485,132           |
| TOP1cc cross-CAD-seq untr ETO MG132 1 | 124,507,963           |
| TOP1cc cross-CAD-seq untr ETO MG132 2 | 117,292,679           |
| TOP1cc cross-CAD-seq DOX 1            | 94,460,687            |
| TOP1cc cross-CAD-seq DOX 2            | 106,474,424           |
| TOP1cc cross-CAD-seq DOX MG132 1      | 105,026,363           |
| TOP1cc cross-CAD-seq DOX MG132 2      | 102,845,262           |
| TOP1cc cross-CAD-seq DOX ETO MG132 1  | 123,477,453           |
| TOP1cc cross-CAD-seq DOX ETO MG132 2  | 166,490,961           |

**Table S2. Number of reads for all the sequencing datasets and number of *Drosophila Melanogaster* genome assembly Release 6 (dm6) spike in reads. Related to Figures 1,6 and 7.**

**Table S3.**

|         | Protein | Fraction | IgG   | Untreated (UN) | Fraction of Total | 0.6 Dox | Fraction of Total |
|---------|---------|----------|-------|----------------|-------------------|---------|-------------------|
| TOP1 IP | TOP1    | Input    | 107.8 | 102.5          | 1.00              | 101.34  |                   |
|         |         | Sup      | 107.1 | 11.6           | 0.03              | 7.53    | 0.02              |
|         |         | pellet   | 0.0   | 89.2           | 0.22              | 90.29   | 0.22              |
|         | TOP2A   | Input    | 56.0  | 54.4           | 1.00              | 47.58   |                   |
|         |         | Sup      | 50.5  | 39.5           | 0.18              | 14.73   | 0.08              |
|         |         | pellet   | 0.0   | 6.0            | 0.03              | 25.97   | 0.13              |

|          | Protein | Fraction | IgG   | Untreated | Fraction of Total | 0.6 Dox | Fraction of Total |
|----------|---------|----------|-------|-----------|-------------------|---------|-------------------|
| TOP2A IP | TOP1    | Input    | 91.3  | 87.4      |                   | 90.32   |                   |
|          |         | Sup      | 83.3  | 63.5      | 0.18              | 44.32   | 0.12              |
|          |         | pellet   | 0.0   | 17.3      | 0.05              | 50.34   | 0.14              |
|          | TOP2A   | Input    | 109.2 | 111.7     |                   | 104.71  |                   |
|          |         | Sup      | 102.7 | 2.1       | 0.00              | 3.06    | 0.01              |
|          |         | pellet   | 0.0   | 104.7     | 0.23              | 99.79   | 0.24              |

**Table S3. Percentage of cellular TOP1 and TOP2A present in the topoisome. Related to Figure 4.**

**N.B:** All values for each fraction are mean of three independent experiments  
 Fraction of total = Fraction/(Input\*4) as IP samples were 4x volume compared to Input
